# Supplementary material for: Selective isolation of the electron or hole in photocatalysis: ZnO–TiO2 and TiO2–ZnO core–shell structured heterojunction nanofibers via electrospinning and atomic layer deposition
Source: Royal Society of Chemistry journal article supplement (doi:10.1039/c3nr06665g), 2014-01-01
Supplement: c3nr06665g1.pdf [file c3nr06665g1.pdf]

## Selective Isolation of *Electron* or *Hole* in Photocatalysis: ZnO-TiO<sub>2</sub> and TiO<sub>2</sub>-ZnO Core-Shell Structured Heterojunction Nanofibers *via* Electrospinning and Atomic Layer Deposition

Fatma Kayaci,<sup>a,b</sup> Sesha Vempati,<sup>\*a</sup> Cagla Ozgit-Akgun,<sup>a,b</sup> Inci Donmez,<sup>a,b</sup> Necmi Biyikli,<sup>a,b</sup> and Tamer Uyar<sup>\*a,b</sup>

<sup>a</sup>UNAM-National Nanotechnology Research Center, Bilkent University, Ankara, 06800, Turkey

<sup>b</sup>Institute of Materials Science & Nanotechnology, Bilkent University, Ankara, 06800, Turkey

Authors for correspondence: SV: svempati01@qub.ac.uk; TU: uyar@unam.bilkent.edu.tr

### Supplementary Information

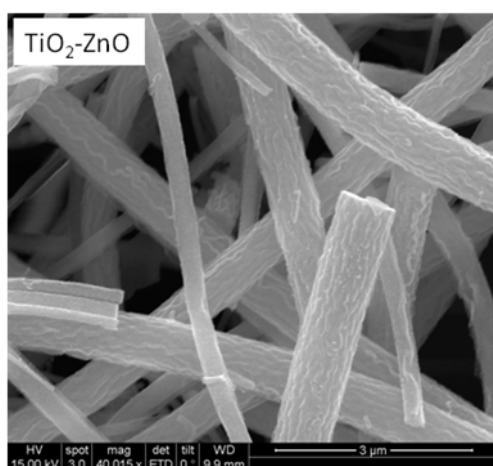

S1. Scanning electron microscope image of TiO<sub>2</sub>-ZnO core-shell heterojunction nanofibers depicting the rough surface.

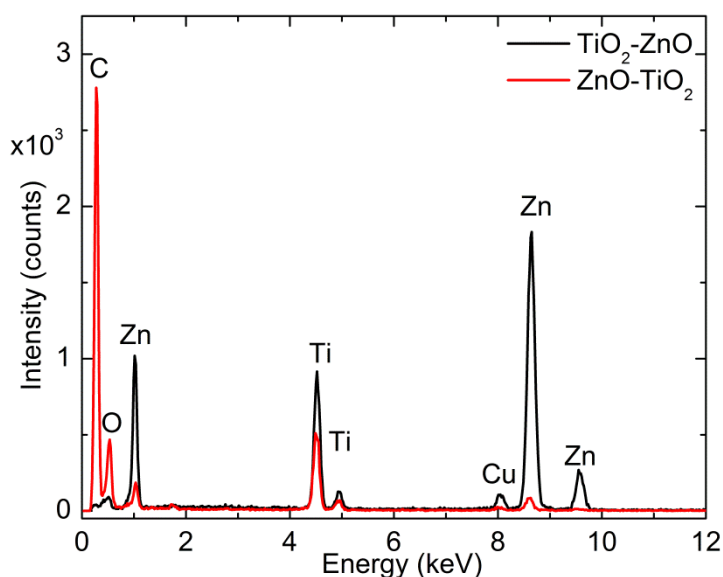

S2. EDX spectra of core-shell heterojunction ZnO-TiO<sub>2</sub> and TiO<sub>2</sub>-ZnO nanofibers.

| Anatase                 |            | Rutile                  |            | ZnO                     |            |
|-------------------------|------------|-------------------------|------------|-------------------------|------------|
| 2 $\theta$ <sup>o</sup> | <i>hkl</i> | 2 $\theta$ <sup>o</sup> | <i>hkl</i> | 2 $\theta$ <sup>o</sup> | <i>hkl</i> |
| 25.367                  | 011        | 27.465                  | 110        | 31.837                  | 010        |
| 37.053                  | 013        | 36.133                  | 011        | 34.502                  | 002        |
| 37.909                  | 004        | 39.232                  | 020        | 36.334                  | 011        |
| 38.667                  | 112        | 41.297                  | 111        | 47.650                  | 012        |
| 48.158                  | 020        | 44.091                  | 120        | 56.726                  | 110        |
| 52.097                  | 022        | 54.392                  | 121        | 63.012                  | 013        |
| 54.051                  | 015        | 56.689                  | 220        | 66.535                  | 020        |
| 55.204                  | 121        | 62.870                  | 002        | 68.114                  | 112        |
| 62.280                  | 123        | 64.121                  | 130        | 69.254                  | 021        |
| 62.866                  | 024        | 65.595                  | 221        | 72.756                  | 004        |
| 68.976                  | 116        | 69.094                  | 031        | 77.155                  | 022        |
| 70.479                  | 220        | 69.921                  | 112        | 81.605                  | 014        |
| 74.303                  | 017        | 72.514                  | 131        | 89.860                  | 023        |
| 75.277                  | 125        | 74.489                  | 230        |                         |            |
| 76.247                  | 031        | 76.667                  | 022        |                         |            |
| 78.913                  | 026        | 79.965                  | 122        |                         |            |
| 81.028                  | 008        | 82.448                  | 231        |                         |            |
| 82.402                  | 033        | 84.355                  | 040        |                         |            |
| 82.927                  | 224        | 87.592                  | 140        |                         |            |
| 83.400                  | 132        | 89.703                  | 222        |                         |            |

S3. XRD peak list and the corresponding *hkl* indices for the two phases of TiO<sub>2</sub> (Anatase and Rutile) and ZnO.

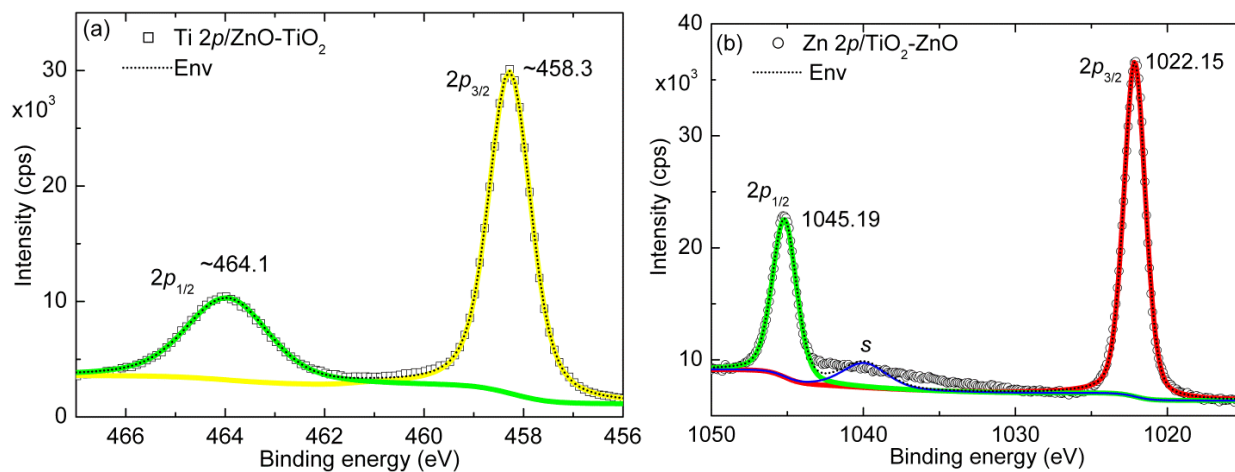

S4. Core-level XPS spectra of core-shell heterojunction nanofibers (a) Ti 2p region for ZnO-TiO<sub>2</sub> and (b) Zn 2p region for TiO<sub>2</sub>-ZnO.

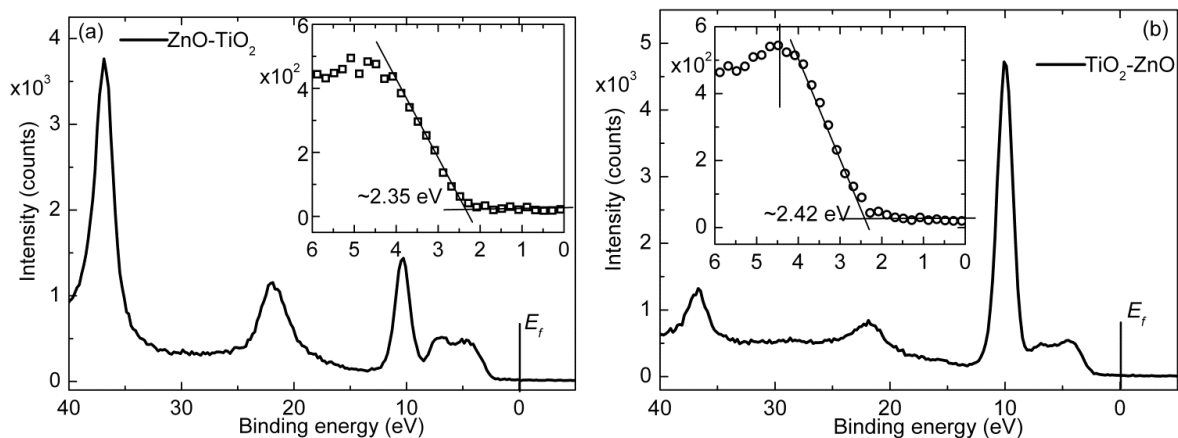

S5. Valance band XPS spectra of core-shell heterojunction nanofibers (a) ZnO-TiO<sub>2</sub> and (b) TiO<sub>2</sub>-ZnO.

| Process                                                                                                             | $t$    | $t$ (ns)          | Nature of the trap                 |
|---------------------------------------------------------------------------------------------------------------------|--------|-------------------|------------------------------------|
| <b>Generation</b>                                                                                                   |        |                   |                                    |
| $\text{TiO}_2 + h\nu \rightarrow e_{CB}^- + h_{VB}^+$                                                               | fs     | ~0.001            |                                    |
| <b>Trapping</b>                                                                                                     |        |                   |                                    |
| $h_{VB}^+ + >\text{Ti}^{\text{IV}}\text{OH} \rightarrow \{\text{Ti}^{\text{IV}}\text{OH}^+\}$                       | 10 ns  | 10                |                                    |
| $e_{CB}^- + >\text{Ti}^{\text{IV}}\text{OH} \leftrightarrow \{>\text{Ti}^{\text{III}}\text{OH}\}$                   | 100 ps | 0.1               | Shallow traps; dynamic equilibrium |
| $e_{CB}^- + >\text{Ti}^{\text{IV}} \rightarrow >\text{Ti}^{\text{III}}$                                             | 10 ns  | 10                | Deep trap; irreversible            |
| <b>Recombination</b>                                                                                                |        |                   |                                    |
| $e_{CB}^- + \{\text{Ti}^{\text{IV}}\text{OH}^+\} \rightarrow >\text{Ti}^{\text{IV}}\text{OH}$                       | 100 ns | 100               |                                    |
| $h_{VB}^+ + \{>\text{Ti}^{\text{III}}\text{OH}\} \rightarrow \text{Ti}^{\text{IV}}\text{OH}$                        | 10 ns  | 10                |                                    |
| <b>Transfer</b>                                                                                                     |        |                   |                                    |
| $\{\text{Ti}^{\text{IV}}\text{OH}^+\}^+ + \text{Red} \rightarrow >\text{Ti}^{\text{IV}}\text{OH} + \text{Red}^{*+}$ | 100 ns | 100               |                                    |
| $e_{tr}^- + \text{Ox} \rightarrow >\text{Ti}^{\text{IV}}\text{OH} + \text{Ox}^{*-}$                                 | ms     | ~n10 <sup>6</sup> |                                    |

S6. Various fundamental processes on the surface of TiO<sub>2</sub> and their time scales [M. R. Hoffmann et al.,

Chem. Rev., 1995, Vol. 95, pp. 69-96] where  $t$ -characteristic time,  $e_{CB}^-$ -electron in conduction band (CB),

$h_{VB}^+$ -hole in valance band,  $>\text{TiOH}$ - primary hydrated (titanol) surface functionality of TiO<sub>2</sub> [W. Stumm,

Chemistry of the Solid Water interface, Wiley-Interscience: New York, 1992; p 428], Red-reductant which is

an electron donor,  $e_{tr}^-$  trapped electron, Ox-oxidant which is an electron acceptor,  $\{\text{Ti}^{\text{IV}}\text{OH}^+\}^+$  surface

trapped valance band hole (surface bound hydroxyl radical) and  $\{>\text{Ti}^{\text{III}}\text{OH}\}$  surface trapped CB electron.

Dynamic equilibrium: reversible trapping of an electron from CB in a shallow trap below the CB edge such

that there is a certain possibility that  $e_{tr}^-$  - can be transferred back to the CB at RT.
